# Supplementary material for: Global chemical weathering dominated by continental arcs since the mid-Paleozoic
Source: Research Square preprint supplement (doi:10.21203/rs.3.rs-91938/v1), 2020-11-19
Supplement: Supplementary file 2 [file 51489ff5be5bc35221eb8ff4.xlsx]

## Sheet: Sheet1
NODE	EMP_CORR	BN_CORR	COND_CORR	FRACT_DIFFERENCE	KEEP_NODE	CI_thresh
ContArc	-0.786806	-0.6995	-0.6995	0.110963	1	0.135758
Suture	0.591773	0.606339	0.4676	-0.0246143	1	0.303564
IceLatitude	-0.718966	-0.677545	-0.299145	0.0576119	1	0.135758
Fragmentation	0.373641	0.408308	0.214017	-0.0927831	1	0.135758
SubductionLength	0.324899	0.194508	-0.18854	0.401327	0	0.231316
SeafloorProduction	-0.303264	-0.260224	-0.108052	0.141924	0	0.135758
Area2020	0.134079	0.205788	0.168267	-0.534835	0	0.135758
Igneous_Sr	0.554173	0.529692	0.0792432	0.0441757	0	0.303564
pCO2_prob_max	-0.571215	-0.480275	-0.0537352	0.159205	0	0.0959955
LIP_Eruptive_Area	-0.0741927	-0.0512323	0.00833393	0.309469	0	0.135758
LIP_Area_1515	-0.139249	-0.0549665	0.00318807	0.605264	0	0.135758
Area1010	-0.0742932	0.0081696	0.0830183	1.10996	0	0.135758
Suture_Av_2_5Ma	0.613954	0.625101	0.162835	-0.0181548	0	0.303564
SubductionLength_Av_2_5Ma	0.309684	0.18466	-0.240165	0.403715	0	0.231316
Fragmentation_Av_2_5Ma	0.400475	0.440846	0.139466	-0.100807	0	0.135758
Area2020_Av_2_5Ma	0.122256	0.193437	0.170007	-0.582221	0	0.135758
SeafloorProduction_Av_2_5Ma	-0.280758	-0.235764	-0.0836603	0.160256	0	0.135758
ContArc_Av_2_5Ma	-0.778697	-0.69085	-0.0555758	0.112812	0	0.135758
Igneous_Sr_Av_2_5Ma	0.540373	0.511026	0.0472973	0.05431	0	0.303564
pCO2_prob_max_Av_2_5Ma	-0.583852	-0.491035	-0.0377377	0.158973	0	0.0959955
LIP_Eruptive_Area_Av_2_5Ma	-0.142479	-0.118411	-0.0208017	0.16892	0	0.135758
IceLatitude_Av_2_5Ma	-0.722303	-0.675268	0.00814406	0.0651182	0	0.135758
Area1010_Av_2_5Ma	-0.0785252	-0.00600061	0.062079	0.923584	0	0.135758
LIP_Area_1515_Av_2_5Ma	-0.145226	-0.0569696	0.00395844	0.607719	0	0.135758
Suture_Av_5Ma	0.643385	0.650097	0.239957	-0.0104324	0	0.303564
SubductionLength_Av_5Ma	0.287257	0.167587	-0.317917	0.416594	0	0.231316
Fragmentation_Av_5Ma	0.424314	0.477044	0.200803	-0.12427	0	0.135758
LIP_Eruptive_Area_Av_5Ma	-0.112883	-0.087937	0.103957	0.220989	0	0.135758
Area2020_Av_5Ma	0.103129	0.176982	0.183693	-0.716125	0	0.135758
SeafloorProduction_Av_5Ma	-0.239862	-0.196667	-0.0523647	0.180084	0	0.135758
ContArc_Av_5Ma	-0.744592	-0.656668	-0.0421673	0.118084	0	0.135758
Igneous_Sr_Av_5Ma	0.519644	0.479092	0.0249468	0.0780375	0	0.303564
IceLatitude_Av_5Ma	-0.707134	-0.659895	-0.0151892	0.066804	0	0.135758
Area1010_Av_5Ma	-0.0788168	-0.0136574	0.055951	0.826719	0	0.135758
pCO2_prob_max_Av_5Ma	-0.581002	-0.493738	0.00339474	0.150197	0	0.0959955
LIP_Area_1515_Av_5Ma	-0.149623	-0.0538939	0.00461571	0.639803	0	0.135758
Suture_Av_7_5Ma	0.665224	0.667956	0.301779	-0.0041066	0	0.303564
Fragmentation_Av_7_5Ma	0.451653	0.51236	0.262126	-0.134411	0	0.135758
SubductionLength_Av_7_5Ma	0.2667	0.146731	-0.391068	0.449828	0	0.231316
LIP_Eruptive_Area_Av_7_5Ma	-0.109655	-0.0839775	0.138563	0.234165	1	0.135758
pCO2_prob_max_Av_7_5Ma	-0.55655	-0.477847	0.0778908	0.141412	0	0.0959955
Igneous_Sr_Av_7_5Ma	0.506519	0.466755	0.0551277	0.0785044	0	0.303564
ContArc_Av_7_5Ma	-0.716205	-0.626418	-0.0487993	0.125365	0	0.135758
Area2020_Av_7_5Ma	0.086886	0.162888	0.173537	-0.874729	0	0.135758
IceLatitude_Av_7_5Ma	-0.676662	-0.634009	0.0230054	0.0630336	0	0.135758
LIP_Area_1515_Av_7_5Ma	-0.156217	-0.0529912	-0.0586131	0.660784	0	0.135758
Area1010_Av_7_5Ma	-0.0763137	-0.0133912	0.0346909	0.824524	0	0.135758
SeafloorProduction_Av_7_5Ma	-0.196943	-0.163423	-0.00529315	0.170203	0	0.135758
Suture_Av_10Ma	0.677539	0.67263	0.327436	0.00724547	1	0.303564
SubductionLength_Av_10Ma	0.257507	0.133395	-0.358692	0.481975	0	0.231316
Fragmentation_Av_10Ma	0.471322	0.537566	0.192482	-0.140549	0	0.135758
LIP_Eruptive_Area_Av_10Ma	-0.0932154	-0.063353	0.126217	0.320359	0	0.135758
IceLatitude_Av_10Ma	-0.626541	-0.588781	0.0907499	0.0602679	0	0.135758
pCO2_prob_max_Av_10Ma	-0.523087	-0.453897	0.0920427	0.132272	0	0.0959955
ContArc_Av_10Ma	-0.688636	-0.596979	-0.0470913	0.133099	0	0.135758
SeafloorProduction_Av_10Ma	-0.162314	-0.136087	0.0477852	0.161582	0	0.135758
LIP_Area_1515_Av_10Ma	-0.16076	-0.0522777	-0.0630367	0.674808	0	0.135758
Igneous_Sr_Av_10Ma	0.486618	0.449525	-0.0129811	0.0762268	0	0.303564
Area1010_Av_10Ma	-0.0727523	-0.00777627	-0.0442066	0.893113	0	0.135758
Area2020_Av_10Ma	0.07387	0.150913	0.100776	-1.04296	0	0.135758
Fragmentation_Av_12_5Ma	0.490377	0.565178	0.259523	-0.152538	0	0.135758
SubductionLength_Av_12_5Ma	0.257746	0.13303	-0.370501	0.483874	0	0.231316
pCO2_prob_max_Av_12_5Ma	-0.495556	-0.429875	0.180169	0.13254	1	0.0959955
Suture_Av_12_5Ma	0.677974	0.667434	0.123684	0.0155472	0	0.303564
LIP_Eruptive_Area_Av_12_5Ma	-0.0947681	-0.0627937	0.15587	0.337396	0	0.135758
Igneous_Sr_Av_12_5Ma	0.448737	0.413825	-0.0697094	0.0778007	0	0.303564
IceLatitude_Av_12_5Ma	-0.572646	-0.54101	0.0617954	0.0552451	0	0.135758
SeafloorProduction_Av_12_5Ma	-0.134638	-0.118601	0.059183	0.119111	0	0.135758
LIP_Area_1515_Av_12_5Ma	-0.158467	-0.0472507	-0.0926949	0.701826	0	0.135758
ContArc_Av_12_5Ma	-0.652686	-0.560848	-0.0233642	0.140708	0	0.135758
Area1010_Av_12_5Ma	-0.0634238	0.00044193	-0.0762612	1.00697	0	0.135758
Area2020_Av_12_5Ma	0.0607066	0.139169	0.0715832	-1.29249	0	0.135758
Fragmentation_Av_15Ma	0.51344	0.582477	0.307861	-0.134459	1	0.135758
SubductionLength_Av_15Ma	0.262828	0.144611	-0.316533	0.449787	0	0.231316
pCO2_prob_max_Av_15Ma	-0.475642	-0.408465	0.179502	0.141234	0	0.0959955
Igneous_Sr_Av_15Ma	0.395748	0.36201	-0.152314	0.0852514	0	0.303564
LIP_Eruptive_Area_Av_15Ma	-0.0785356	-0.047364	0.163795	0.39691	0	0.135758
IceLatitude_Av_15Ma	-0.518621	-0.495013	0.0528951	0.0455198	0	0.135758
SeafloorProduction_Av_15Ma	-0.092511	-0.0878383	0.0451681	0.0505089	0	0.135758
Suture_Av_15Ma	0.673082	0.658602	0.0367411	0.0215126	0	0.303564
ContArc_Av_15Ma	-0.611785	-0.521123	0.0391241	0.148193	0	0.135758
LIP_Area_1515_Av_15Ma	-0.157657	-0.0415402	-0.0732905	0.736515	0	0.135758
Area2020_Av_15Ma	0.0453779	0.125086	-0.0202441	-1.75655	0	0.135758
Area1010_Av_15Ma	-0.0525634	0.00969922	-0.157922	1.18452	0	0.135758
SubductionLength_Av_17_5Ma	0.263518	0.159344	-0.314765	0.395321	0	0.231316
Fragmentation_Av_17_5Ma	0.543132	0.604808	0.173425	-0.113555	0	0.135758
Igneous_Sr_Av_17_5Ma	0.353223	0.322507	-0.168238	0.0869576	0	0.303564
pCO2_prob_max_Av_17_5Ma	-0.463086	-0.39109	0.181409	0.155471	0	0.0959955
LIP_Eruptive_Area_Av_17_5Ma	-0.0641996	-0.0397768	0.179117	0.380419	0	0.135758
Suture_Av_17_5Ma	0.662637	0.64481	0.0786163	0.026903	0	0.303564
SeafloorProduction_Av_17_5Ma	-0.0364202	-0.0404023	0.0708667	-0.109339	0	0.135758
ContArc_Av_17_5Ma	-0.569675	-0.480487	0.0669721	0.156561	0	0.135758
IceLatitude_Av_17_5Ma	-0.474314	-0.455367	0.0567939	0.0399456	0	0.135758
LIP_Area_1515_Av_17_5Ma	-0.156374	-0.0336817	-0.0382759	0.784608	0	0.135758
Area2020_Av_17_5Ma	0.0286546	0.108969	-0.0105545	-2.80284	0	0.135758
Area1010_Av_17_5Ma	-0.0426362	0.0200239	-0.102935	1.46965	0	0.135758
Fragmentation_Av_20Ma	0.581808	0.634935	0.304366	-0.0913133	0	0.135758
SubductionLength_Av_20Ma	0.254117	0.170534	-0.320798	0.328915	0	0.231316
pCO2_prob_max_Av_20Ma	-0.45708	-0.381131	0.182499	0.166163	1	0.0959955
Suture_Av_20Ma	0.638258	0.6154	0.167673	0.0358131	0	0.303564
Igneous_Sr_Av_20Ma	0.30387	0.278436	-0.118756	0.0837014	0	0.303564
SeafloorProduction_Av_20Ma	0.0287926	0.0207012	0.150946	0.281025	1	0.135758
LIP_Eruptive_Area_Av_20Ma	-0.0672168	-0.0415402	0.174022	0.381997	0	0.135758
ContArc_Av_20Ma	-0.524213	-0.434721	0.102986	0.170718	0	0.135758
IceLatitude_Av_20Ma	-0.435566	-0.41779	-0.0300375	0.0408121	0	0.135758
LIP_Area_1515_Av_20Ma	-0.160499	-0.0317141	0.0377496	0.802402	0	0.135758
Area1010_Av_20Ma	-0.0313325	0.0344956	-0.0236485	2.10095	0	0.135758
Area2020_Av_20Ma	0.00873306	0.0896687	0.0533935	-9.26773	0	0.135758
Fragmentation_Av_22_5Ma	0.620082	0.659171	0.359621	-0.063038	0	0.135758
SubductionLength_Av_22_5Ma	0.238437	0.176821	-0.291647	0.258415	1	0.231316
SeafloorProduction_Av_22_5Ma	0.101289	0.0891966	0.235814	0.119387	0	0.135758
Suture_Av_22_5Ma	0.610613	0.584312	0.153919	0.0430741	0	0.303564
IceLatitude_Av_22_5Ma	-0.394429	-0.37642	-0.117799	0.0456586	0	0.135758
Igneous_Sr_Av_22_5Ma	0.245649	0.225241	0.095051	0.0830787	0	0.303564
LIP_Area_1515_Av_22_5Ma	-0.167371	-0.032623	-0.153653	0.805086	0	0.135758
ContArc_Av_22_5Ma	-0.477617	-0.387292	0.022883	0.189115	0	0.135758
LIP_Eruptive_Area_Av_22_5Ma	-0.0929801	-0.065385	-0.0201555	0.296785	0	0.135758
pCO2_prob_max_Av_22_5Ma	-0.46112	-0.383422	-0.0152462	0.168499	0	0.0959955
Area1010_Av_22_5Ma	-0.0195525	0.0492749	-0.131247	3.52013	0	0.135758
Area2020_Av_22_5Ma	-0.0148841	0.06853	-0.103878	5.60426	0	0.135758
Fragmentation_Av_25Ma	0.653899	0.682275	0.3681	-0.0433958	0	0.135758
SeafloorProduction_Av_25Ma	0.17397	0.161579	0.310455	0.0712237	0	0.135758
Suture_Av_25Ma	0.578518	0.563081	0.178983	0.0266835	0	0.303564
SubductionLength_Av_25Ma	0.217659	0.169007	-0.190497	0.223521	0	0.231316
Igneous_Sr_Av_25Ma	0.201892	0.187789	0.11565	0.0698546	0	0.303564
IceLatitude_Av_25Ma	-0.348641	-0.330864	-0.0711904	0.0509885	0	0.135758
LIP_Eruptive_Area_Av_25Ma	-0.0782503	-0.0542235	-0.0950401	0.30705	0	0.135758
ContArc_Av_25Ma	-0.443036	-0.353353	0.0537683	0.202427	0	0.135758
LIP_Area_1515_Av_25Ma	-0.171698	-0.0369515	-0.148772	0.784788	0	0.135758
pCO2_prob_max_Av_25Ma	-0.471917	-0.392985	-0.0131101	0.167259	0	0.0959955
Area2020_Av_25Ma	-0.0377611	0.04607	-0.127267	2.22004	0	0.135758
Area1010_Av_25Ma	-0.0099295	0.0556642	-0.0586128	6.60594	0	0.135758
Fragmentation_Av_27_5Ma	0.676709	0.690512	0.343545	-0.0203968	0	0.135758
SeafloorProduction_Av_27_5Ma	0.220119	0.206434	0.312444	0.0621684	1	0.135758
Suture_Av_27_5Ma	0.542053	0.543945	0.237644	-0.00349108	0	0.303564
SubductionLength_Av_27_5Ma	0.200818	0.155336	-0.238835	0.226481	0	0.231316
Igneous_Sr_Av_27_5Ma	0.169464	0.160181	0.176007	0.0547744	0	0.303564
LIP_Eruptive_Area_Av_27_5Ma	-0.0710112	-0.0449677	-0.0937634	0.366752	0	0.135758
IceLatitude_Av_27_5Ma	-0.2982	-0.277874	-0.058367	0.0681629	0	0.135758
ContArc_Av_27_5Ma	-0.416689	-0.328717	0.0603605	0.211122	0	0.135758
pCO2_prob_max_Av_27_5Ma	-0.481141	-0.400862	0.0164701	0.166851	0	0.0959955
LIP_Area_1515_Av_27_5Ma	-0.184033	-0.0510204	-0.0360573	0.722765	0	0.135758
Area2020_Av_27_5Ma	-0.0565043	0.0276498	-0.0176677	1.48934	0	0.135758
Area1010_Av_27_5Ma	-0.00298517	0.0621198	0.0703141	21.8095	0	0.135758
Fragmentation_Av_30Ma	0.677911	0.678693	0.26262	-0.00115444	0	0.135758
Suture_Av_30Ma	0.495848	0.517183	0.259837	-0.0430273	0	0.303564
SubductionLength_Av_30Ma	0.189926	0.145864	-0.231543	0.231997	0	0.231316
LIP_Eruptive_Area_Av_30Ma	-0.0659633	-0.0431406	-0.138054	0.34599	0	0.135758
Igneous_Sr_Av_30Ma	0.132559	0.123772	0.0919521	0.0662824	0	0.303564
pCO2_prob_max_Av_30Ma	-0.490632	-0.41465	0.0916067	0.154866	0	0.0959955
ContArc_Av_30Ma	-0.390708	-0.303132	0.0619828	0.224147	0	0.135758
SeafloorProduction_Av_30Ma	0.233068	0.224426	0.0324675	0.037082	0	0.135758
LIP_Area_1515_Av_30Ma	-0.199911	-0.071742	-0.0561723	0.641131	0	0.135758
IceLatitude_Av_30Ma	-0.249793	-0.225336	0.00375647	0.0979101	0	0.135758
Area2020_Av_30Ma	-0.0702494	0.0131756	0.00361219	1.18755	0	0.135758
Area1010_Av_30Ma	0.00176018	0.0686623	0.118754	-38.0086	0	0.135758
Suture_Av_32_5Ma	0.447022	0.485125	0.291596	-0.0852382	0	0.303564
Fragmentation_Av_32_5Ma	0.681391	0.67426	0.212345	0.0104649	1	0.135758
SubductionLength_Av_32_5Ma	0.18318	0.139466	-0.21818	0.23864	0	0.231316
pCO2_prob_max_Av_32_5Ma	-0.492542	-0.428657	0.135875	0.129706	1	0.0959955
ContArc_Av_32_5Ma	-0.36919	-0.282713	0.127406	0.234234	0	0.135758
SeafloorProduction_Av_32_5Ma	0.243411	0.230987	0.0213243	0.0510421	0	0.135758
IceLatitude_Av_32_5Ma	-0.203923	-0.176291	-0.0208492	0.135504	0	0.135758
LIP_Area_1515_Av_32_5Ma	-0.214465	-0.0950799	0.0404022	0.556664	0	0.135758
LIP_Eruptive_Area_Av_32_5Ma	-0.0300398	-0.0118627	0.0159793	0.605101	0	0.135758
Igneous_Sr_Av_32_5Ma	0.108549	0.107807	-0.00502411	0.00683714	0	0.303564
Area2020_Av_32_5Ma	-0.081019	0.000583149	-0.0369191	1.0072	0	0.135758
Area1010_Av_32_5Ma	0.00295735	0.0726831	0.118863	-23.5772	0	0.135758
Suture_Av_35Ma	0.395936	0.444718	0.280685	-0.123206	0	0.303564
SubductionLength_Av_35Ma	0.177173	0.133686	-0.166641	0.24545	0	0.231316
ContArc_Av_35Ma	-0.348371	-0.263356	0.131031	0.244034	0	0.135758
pCO2_prob_max_Av_35Ma	-0.485761	-0.441553	0.0932976	0.0910085	0	0.0959955
SeafloorProduction_Av_35Ma	0.264088	0.24187	0.0659874	0.0841294	0	0.135758
Igneous_Sr_Av_35Ma	0.0833886	0.0880648	-0.0483165	-0.0560769	0	0.303564
IceLatitude_Av_35Ma	-0.157403	-0.125107	0.0118437	0.205183	0	0.135758
LIP_Area_1515_Av_35Ma	-0.23894	-0.120947	-0.012033	0.49382	0	0.135758
Fragmentation_Av_35Ma	0.696291	0.680302	0.00233364	0.0229622	0	0.135758
Area2020_Av_35Ma	-0.0945665	-0.0143533	0.00585198	0.84822	0	0.135758
LIP_Eruptive_Area_Av_35Ma	0.0115316	0.0314689	0.0708371	-1.72893	0	0.135758
Area1010_Av_35Ma	-0.000307819	0.0745426	0.138372	243.164	0	0.135758
Suture_Av_37_5Ma	0.333611	0.385858	0.230351	-0.156611	0	0.303564
Igneous_Sr_Av_37_5Ma	0.0448627	0.0459335	-0.105291	-0.0238683	0	0.303564
SubductionLength_Av_37_5Ma	0.170575	0.124847	-0.136582	0.268082	0	0.231316
SeafloorProduction_Av_37_5Ma	0.289648	0.250941	0.113408	0.133635	0	0.135758
LIP_Eruptive_Area_Av_37_5Ma	0.0497033	0.0710734	0.153953	-0.429953	0	0.135758
ContArc_Av_37_5Ma	-0.333263	-0.251139	0.094432	0.246424	0	0.135758
Fragmentation_Av_37_5Ma	0.715324	0.690026	0.065888	0.0353657	0	0.135758
pCO2_prob_max_Av_37_5Ma	-0.467947	-0.443865	0.0553686	0.0514631	0	0.0959955
IceLatitude_Av_37_5Ma	-0.119147	-0.0836421	0.0162911	0.29799	0	0.135758
Area2020_Av_37_5Ma	-0.111749	-0.0333256	0.0359922	0.701783	0	0.135758
LIP_Area_1515_Av_37_5Ma	-0.251416	-0.131992	-0.00722054	0.475007	0	0.135758
Area1010_Av_37_5Ma	-0.00568087	0.074022	0.162725	14.03	0	0.135758
SeafloorProduction_Av_40Ma	0.318567	0.264962	0.167586	0.168266	1	0.135758
Suture_Av_40Ma	0.264063	0.31447	0.157324	-0.190892	0	0.303564
Fragmentation_Av_40Ma	0.740172	0.6992	0.10638	0.0553549	0	0.135758
Igneous_Sr_Av_40Ma	0.0127172	0.0155948	-0.100207	-0.226277	0	0.303564
SubductionLength_Av_40Ma	0.163099	0.111824	-0.0846791	0.314377	0	0.231316
LIP_Eruptive_Area_Av_40Ma	0.0355756	0.0603925	0.136894	-0.69758	0	0.135758
Area2020_Av_40Ma	-0.130609	-0.0580069	0.084103	0.555873	0	0.135758
LIP_Area_1515_Av_40Ma	-0.259076	-0.14309	0.0444262	0.447693	0	0.135758
ContArc_Av_40Ma	-0.322841	-0.242785	0.0273439	0.247975	0	0.135758
pCO2_prob_max_Av_40Ma	-0.446097	-0.432869	0.0187754	0.0296535	0	0.0959955
IceLatitude_Av_40Ma	-0.081523	-0.0440014	0.0117554	0.460258	0	0.135758
Area1010_Av_40Ma	-0.0150943	0.0679391	0.175213	5.50099	0	0.135758
SeafloorProduction_Av_42_5Ma	0.348124	0.295525	0.18216	0.151092	0	0.135758
Fragmentation_Av_42_5Ma	0.753899	0.700482	0.118368	0.0708543	0	0.135758
Igneous_Sr_Av_42_5Ma	-0.011632	-0.0121162	-0.102186	-0.0416234	0	0.303564
Suture_Av_42_5Ma	0.190161	0.232385	0.0607178	-0.222042	0	0.303564
Area2020_Av_42_5Ma	-0.151609	-0.084617	0.0795707	0.441874	0	0.135758
SubductionLength_Av_42_5Ma	0.157879	0.101523	-0.0407898	0.356955	0	0.231316
pCO2_prob_max_Av_42_5Ma	-0.42197	-0.41196	-0.0167516	0.0237221	0	0.0959955
IceLatitude_Av_42_5Ma	-0.0628197	-0.0218227	0.0175596	0.652614	0	0.135758
LIP_Area_1515_Av_42_5Ma	-0.2672	-0.156542	0.00820111	0.414137	0	0.135758
ContArc_Av_42_5Ma	-0.313425	-0.237822	0.00413714	0.241214	0	0.135758
LIP_Eruptive_Area_Av_42_5Ma	0.0137303	0.0275293	0.0382453	-1.005	0	0.135758
Area1010_Av_42_5Ma	-0.0282882	0.057439	0.163868	3.03049	0	0.135758
SeafloorProduction_Av_45Ma	0.377626	0.324739	0.211051	0.140051	0	0.135758
Fragmentation_Av_45Ma	0.758164	0.698948	0.112229	0.0781049	0	0.135758
Igneous_Sr_Av_45Ma	-0.0323677	-0.0390263	-0.126843	-0.205718	0	0.303564
pCO2_prob_max_Av_45Ma	-0.400847	-0.390938	-0.0713079	0.0247203	0	0.0959955
Area2020_Av_45Ma	-0.175793	-0.106165	0.0902726	0.396079	0	0.135758
ContArc_Av_45Ma	-0.298519	-0.226217	0.0470128	0.242203	0	0.135758
Suture_Av_45Ma	0.115858	0.15596	-0.0398763	-0.346125	0	0.303564
LIP_Area_1515_Av_45Ma	-0.263898	-0.152037	0.0320654	0.423878	0	0.135758
SubductionLength_Av_45Ma	0.157988	0.0995184	0.0145769	0.37009	0	0.231316
IceLatitude_Av_45Ma	-0.0475638	0.00132584	0.0529732	1.02787	0	0.135758
LIP_Eruptive_Area_Av_45Ma	0.0134698	0.0375571	0.0130224	-1.78824	0	0.135758
Area1010_Av_45Ma	-0.0435837	0.0456028	0.144187	2.04633	0	0.135758
SeafloorProduction_Av_47_5Ma	0.390556	0.34282	0.216088	0.122225	1	0.135758
pCO2_prob_max_Av_47_5Ma	-0.380244	-0.370929	-0.10982	0.0244958	1	0.0959955
Igneous_Sr_Av_47_5Ma	-0.0503848	-0.0615917	-0.140506	-0.222426	0	0.303564
ContArc_Av_47_5Ma	-0.282783	-0.214928	0.102936	0.239955	0	0.135758
SubductionLength_Av_47_5Ma	0.164722	0.107837	0.110637	0.345341	0	0.231316
Suture_Av_47_5Ma	0.0486953	0.0830183	-0.199624	-0.704852	0	0.303564
LIP_Area_1515_Av_47_5Ma	-0.255792	-0.143435	0.0932718	0.43925	0	0.135758
Fragmentation_Av_47_5Ma	0.749821	0.687266	0.0398779	0.0834262	0	0.135758
Area2020_Av_47_5Ma	-0.206155	-0.133117	0.0518156	0.35429	0	0.135758
Area1010_Av_47_5Ma	-0.0637954	0.0319381	0.0678312	1.50063	0	0.135758
IceLatitude_Av_47_5Ma	-0.0365948	0.0218409	0.152953	1.59683	0	0.135758
LIP_Eruptive_Area_Av_47_5Ma	1.70446e-05	0.0375588	-0.0569109	-2202.56	0	0.135758
SubductionLength_Av_50Ma	0.172814	0.117663	0.197144	0.319132	0	0.231316
Igneous_Sr_Av_50Ma	-0.0610688	-0.0709408	-0.143769	-0.161655	0	0.303564
ContArc_Av_50Ma	-0.267419	-0.207641	0.145981	0.223536	1	0.135758
LIP_Area_1515_Av_50Ma	-0.243193	-0.131025	0.15007	0.461231	0	0.135758
SeafloorProduction_Av_50Ma	0.39412	0.34884	0.077081	0.11489	0	0.135758
Area2020_Av_50Ma	-0.240273	-0.164064	-0.0784234	0.317179	0	0.135758
pCO2_prob_max_Av_50Ma	-0.353211	-0.340836	-0.0186168	0.0350355	0	0.0959955
Fragmentation_Av_50Ma	0.735896	0.672755	-0.0138376	0.0858017	0	0.135758
Area1010_Av_50Ma	-0.084247	0.0171242	-0.100008	1.20326	0	0.135758
Suture_Av_50Ma	-0.0138258	0.00545034	-0.304497	1.39421	0	0.303564
IceLatitude_Av_50Ma	-0.027343	0.0406431	0.146937	2.48642	0	0.135758
LIP_Eruptive_Area_Av_50Ma	0.00271069	0.0466521	-0.103217	-16.2104	0	0.135758
